# Supplementary material
Source: PubMed Central journal article supplement (PMC4958182)
Supplement: AAC.00075-16_zac008165389so1.pdf [file AAC.00075-16_zac008165389so1.pdf]

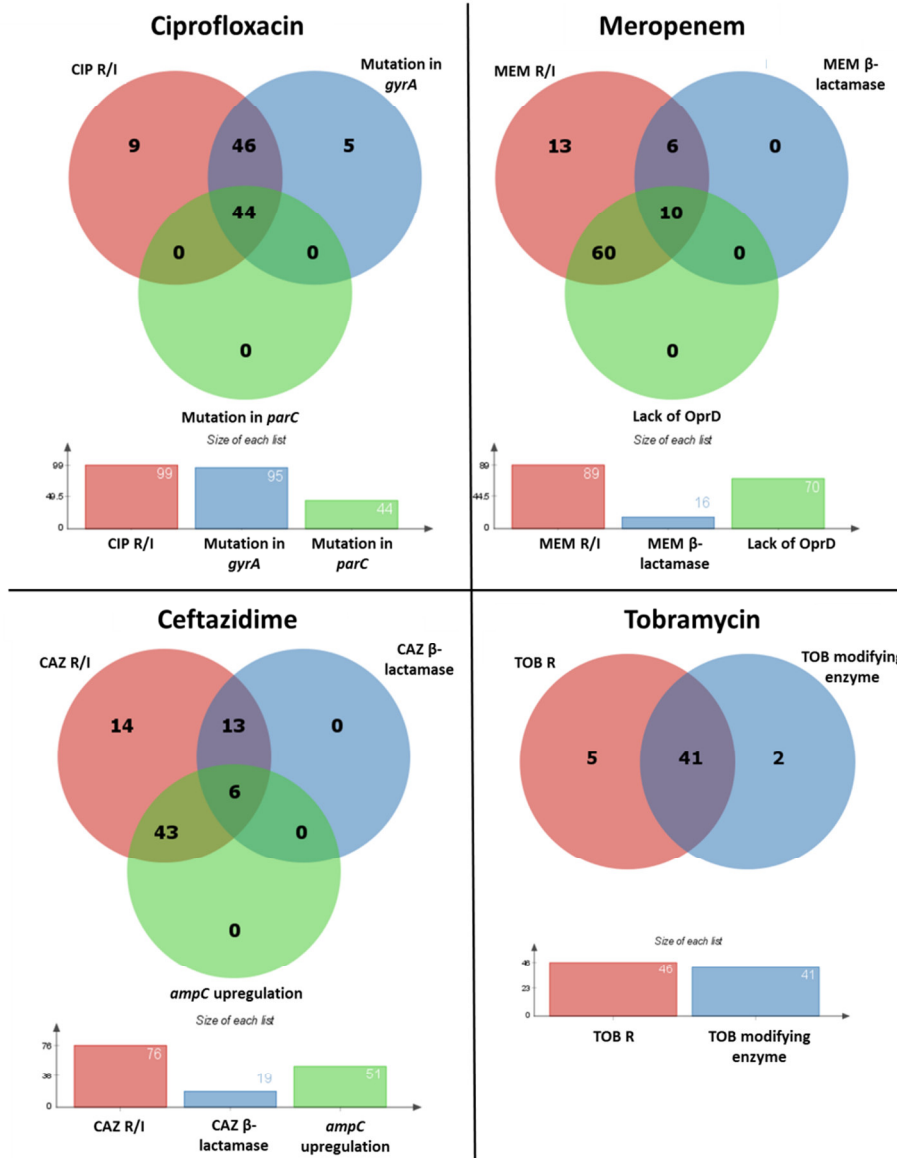

**Supplementary Figure 1: Contribution of horizontally and chromosomally acquired genetic determinants to the resistance phenotype of clinical isolates**

R = resistant isolates, I = intermediate isolates. Lack of OprD means loss of functional OprD protein and/or repression of the *oprD* gene. The *ampC* upregulation threshold was defined as  $\log_2FC = 3.9$ .

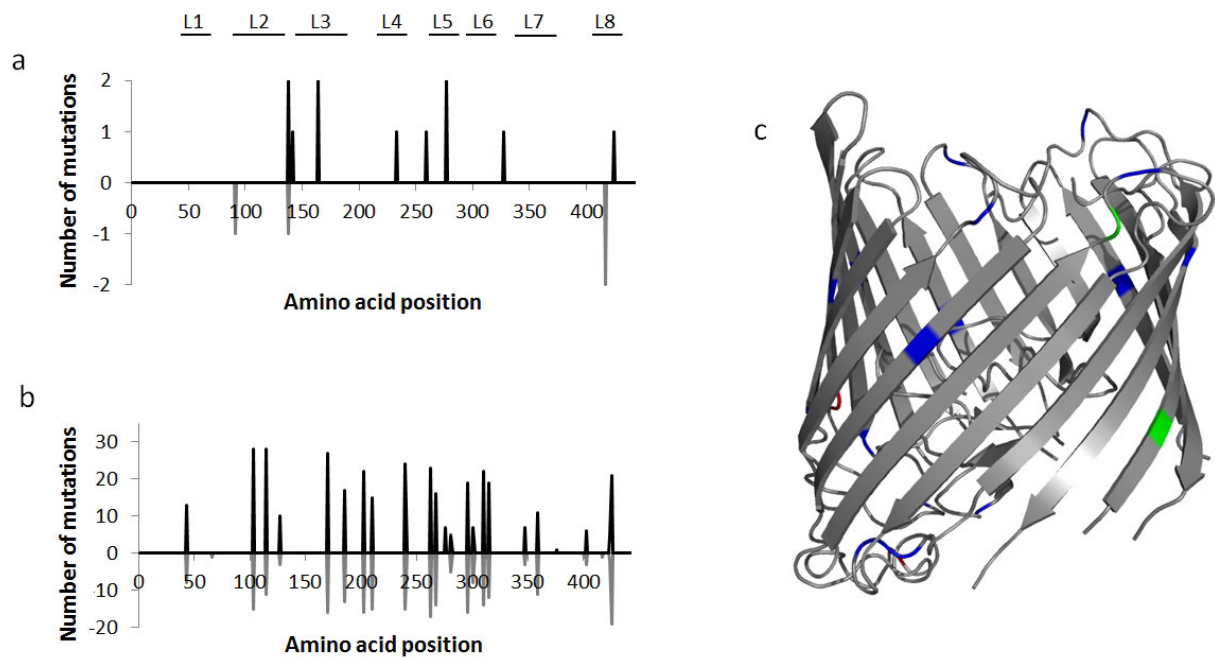

### Supplementary Figure 2: OprD sequence modifications by non-synonymous SNPs

**A:** Nonsense mutation sites indicating premature translational stops. **B:** Total amounts of SNPs leading to single amino acid exchanges. The x-axis highlights the positions of the modified amino acids relative to protein length. Mutations in MEM resistant ( $n = 46$ ) isolates are depicted above the x-axis (black), amino acid exchanges in MEM susceptible ( $n = 32$ ) strains below the axis (grey). The positions of the eight external loops are labeled L1 to L8 (according to Huang *et al.* (1)). **C:** SNPs (excluding stop sites) mapped to the tridimensional structure of PAO1 OprD based on the model by Biswas *et al.* (2). SNPs exclusively found in the MEM susceptible isolates are labeled in green, those found in the MEM resistant in red and those found in both in blue.

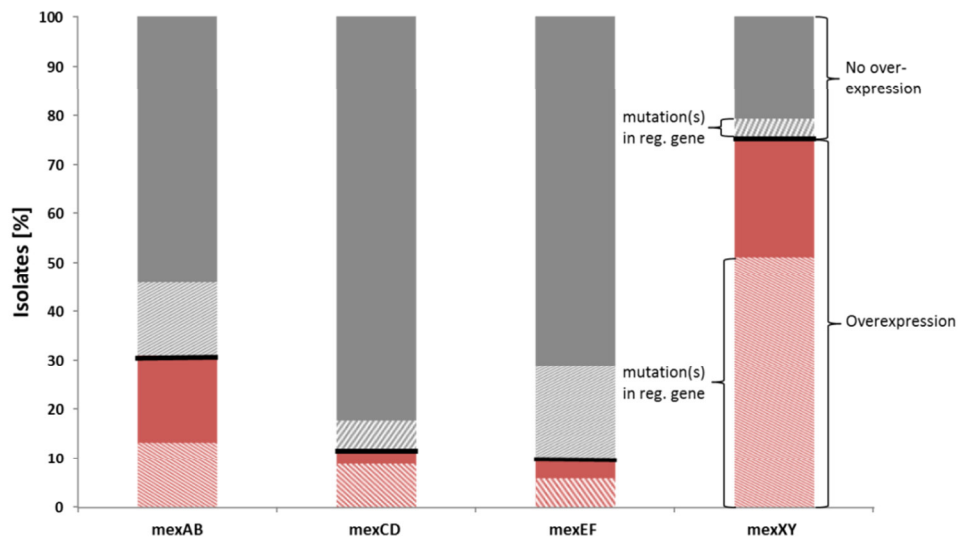

**Supplementary Figure 3: Distribution of efflux pump expression in our panel of clinical isolates**

The relative percentage of isolates with an overexpression of one of the four efflux pumps (MexAB, MexCD, MexEF and MexXY) is depicted in red. Furthermore the relative percentage of isolates that harbor at least one mutation (non-synonymous SNP or Indel) in the corresponding negative regulatory gene (*mexR*, *nfxB*, *mexZ*, *mexS*) is indicated as shaded area. Commonly occurring SNPs between reference strains were excluded from the analysis.

**Supplementary Table 1: Clinical isolates included in this study with antibiotic resistance profile and infection**

site

| Isolate  | Cystic fibrosis | Infection site    | MEM MIC* |       | CAZ MIC* |      | TOB MIC* |        | CIP MIC* |       |
|----------|-----------------|-------------------|----------|-------|----------|------|----------|--------|----------|-------|
| PSAE0613 | nd              | nd                | S        | 0.25  | S        | 8    | S        | 0.5    | R        | 128   |
| PSAE1152 | nd              | drainage_catheter | R        | 64    | R        | 128  | R        | 32     | R        | 32    |
| PSAE1471 | nd              | respiratory tract | S        | 0.5   | S        | 2    | S        | 0.25   | R        | 4     |
| PSAE1640 | nd              | urine             | S        | 2     | S        | 8    | S        | 4      | R        | 64    |
| PSAE1646 | nd              | urine             | R        | 16    | S        | 4    | S        | 2      | I        | 2     |
| PSAE1655 | nd              | respiratory tract | I        | 8     | S        | 4    | S        | 1      | I        | 2     |
| PSAE1657 | nd              | respiratory tract | R        | 16    | S        | 8    | S        | 0.5    | I        | 2     |
| PSAE1659 | nd              | respiratory tract | I        | 8     | I        | 16   | S        | 4      | I        | 2     |
| PSAE1660 | nd              | respiratory tract | R        | 16    | S        | 8    | S        | 1      | I        | 2     |
| PSAE1661 | nd              | respiratory tract | R        | 128   | R        | 64   | R        | 128    | R        | 32    |
| PSAE1688 | nd              | urine             | I        | 8     | S        | 4    | S        | 0.5    | S        | 0.5   |
| PSAE1695 | nd              | respiratory tract | S        | 1     | S        | 4    | S        | 4      | R        | 64    |
| PSAE1711 | nd              | nd                | S        | 0.5   | S        | 1    | S        | 0.5    | R        | >128  |
| PSAE1715 | nd              | respiratory tract | I        | 8     | S        | 4    | S        | 0.5    | S        | 1     |
| PSAE1716 | nd              | blood             | I        | 8     | R        | 32   | R        | >1024  | R        | 32    |
| PSAE1747 | nd              | respiratory tract | R        | 16    | R        | 64   | R        | >1024  | R        | 16    |
| PSAE1758 | nd              | respiratory tract | S        | 0.25  | S        | 2    | S        | 0.25   | R        | 4     |
| PSAE1766 | nd              | respiratory tract | R        | 16    | S        | 8    | S        | 0.5    | S        | 1     |
| PSAE1775 | nd              | respiratory tract | I        | 8     | S        | 4    | S        | 1      | S        | 0.5   |
| PSAE1793 | nd              | respiratory tract | R        | >32   | S        | 8    | R        | 8      | R        | 8     |
| PSAE1807 | nd              | respiratory tract | I        | 8     | R        | 64   | S        | 0.5    | S        | 0.25  |
| PSAE1829 | nd              | respiratory tract | I        | 8     | S        | 4    | S        | 0.5    | I        | 2     |
| PSAE1875 | nd              | respiratory tract | R        | 16    | S        | 4    | S        | 2      | S        | 0.5   |
| PSAE1892 | nd              | respiratory tract | S        | 2     | S        | 4    | S        | 0.25   | R        | 32    |
| PSAE1910 | nd              | respiratory tract | S        | 0.25  | S        | 1    | S        | 2      | R        | 4     |
| PSAE1928 | nd              | respiratory tract | S        | 2     | R        | 32   | S        | 0.125  | R        | 32    |
| PSAE1950 | nd              | respiratory tract | S        | 1     | S        | 0.5  | S        | 1      | R        | 8     |
| PSAE2134 | nd              | respiratory tract | R        | 32    | I        | 16   | R        | 256    | R        | 16    |
| PSAE2136 | nd              | respiratory tract | R        | 16    | R        | 64   | R        | 128    | R        | 16    |
| PSAE2162 | nd              | nd                | R        | 32    | R        | 128  | R        | 8      | R        | 16    |
| PSAE2180 | nd              | urine             | R        | 64    | R        | 128  | R        | 32     | R        | 8     |
| PSAE2302 | nd              | respiratory tract | I        | 8     | R        | 64   | S        | 2      | R        | 4     |
| PSAE2305 | nd              | respiratory tract | S        | 0.25  | S        | 4    | S        | 0.25   | R        | 4     |
| PSAE2307 | nd              | respiratory tract | R        | 32    | R        | 128  | S        | 0.5    | R        | 64    |
| PSAE2319 | nd              | nd                | R        | 64    | R        | 128  | R        | 32     | R        | 128   |
| PSAE2324 | nd              | respiratory tract | S        | 4     | S        | 2    | S        | 0.5    | S        | 0.063 |
| PSAE2326 | nd              | urine             | R        | 16    | R        | 32   | S        | 2      | R        | 16    |
| PSAE2328 | nd              | urine             | R        | 8-16. | S        | 2    | S        | 1      | S        | 0.125 |
| PSAE2335 | nd              | urine             | R        | 128   | R        | >256 | R        | 32     | R        | 16    |
| PSAE2338 | nd              | respiratory tract | R        | 64    | R        | 128  | R        | > 1024 | R        | 64    |
| MHH6827  | no              | midstream urine   | I        | 8     | R        | 32   | R        | 16     | R        | >8    |
| MHH6829  | no              | midstream urine   | R        | 16    | I        | 16   | S        | 1      | R        | >8    |

|                |     |                           |   |       |   |      |   |        |   |      |
|----------------|-----|---------------------------|---|-------|---|------|---|--------|---|------|
| <b>MHH6870</b> | no  | midstream urine           | I | 8     | R | >32  | R | 32     | R | >8   |
| <b>MHH6887</b> | no  | tracheal secrete          | S | 0.125 | R | 32   | S | 0.5    | I | 2    |
| <b>MHH6938</b> | no  | bronchoalveolar lavage    | I | 4     | I | 16   | R | 32     | R | >8   |
| <b>MHH6964</b> | no  | wound swab abdomen        | I | 8     | S | 8    | R | 16     | R | 8    |
| <b>MHH7032</b> | no  | venous catheter           | I | 8     | I | 16   | R | 32     | R | >8   |
| <b>MHH7055</b> | no  | bronchoalveolar lavage    | I | 8     | S | 4    | S | 1      | R | 8    |
| <b>MHH7084</b> | no  | permanent catheter urine  | I | 8     | R | 32   | R | 16     | R | >8   |
| <b>MHH7091</b> | yes | lung transplant recipient | S | 0.5   | S | 4    | S | 2      | S | 1    |
| <b>MHH7125</b> | no  | tonsil swab               | I | 4     | S | 8    | R | 32     | R | >8   |
| <b>MHH7135</b> | no  | bronchial secrete         | I | 4     | S | 4    | S | 1      | R | 8    |
| <b>MHH7176</b> | no  | midstream urine           | I | 8     | R | 32   | R | 32     | R | >8   |
| <b>MHH7200</b> | yes | tonsil swab               | I | 4     | R | >32  | R | >32    | R | >8   |
| <b>MHH7252</b> | no  | tracheal secrete          | I | 4     | S | 2    | S | 0.5    | I | 2    |
| <b>MHH7261</b> | no  | permanent catheter urine  | I | 8     | R | 32   | R | 16     | R | >8   |
| <b>MHH7313</b> | no  | tracheal secrete          | I | 8     | S | 4    | S | 0.5    | R | 4    |
| <b>MHH7368</b> | no  | nasal swab                | I | 8     | I | 16   | R | 32     | R | >8   |
| <b>MHH7444</b> | yes | bronchoalveolar lavage    | I | 8     | R | >32  | S | 2      | I | 2    |
| <b>MHH7508</b> | yes | bronchial secrete         | I | 8     | R | 32   | R | 16     | S | 1    |
| <b>MHH7818</b> | yes | tracheal secrete          | I | 4     | S | 8    | R | 32     | S | 1    |
| <b>MHH7823</b> | no  | tonsil swab               | I | 8     | R | >32  | R | 16     | R | >8   |
| <b>MHH7863</b> | no  | bronchial secrete         | I | 8     | R | 32   | R | 16     | R | >8   |
| <b>MHH8044</b> | yes | tracheal secrete          | I | 8     | R | 32   | S | 1      | I | 2    |
| <b>MHH8349</b> | no  | midstream urine           | I | 8     | R | >32  | R | >32    | R | >8   |
| <b>MHH8478</b> | no  | midstream urine           | S | 1     | R | 32   | R | 32     | R | >8   |
| <b>MHH8482</b> | yes | bronchial secrete         | I | 8     | R | >32  | R | 8      | I | 2    |
| <b>MHH8607</b> | no  | sputum                    | R | 16    | R | >32  | R | 16     | I | 2    |
| <b>MHH8613</b> | no  | ear swab                  | S | 2     | R | >32  | R | >32    | R | >8   |
| <b>MHH8614</b> | no  | midstream urine           | S | 1     | R | 32   | R | 32     | R | >8   |
| <b>MHH8627</b> | no  | drainage bile duct        | R | >32   | I | 16   | S | 0.5    | S | 0.25 |
| <b>MHH8697</b> | no  | rectal swab               | R | >16   | S | <1   | S | 2      | R | >8   |
| <b>MHH9157</b> | no  | wound swab abdomen        | S | 1     | R | >32  | S | 1      | S | 0.5  |
| <b>MHH9229</b> | no  | tonsil swab               | I | 4     | I | 16   | S | 1      | S | 1    |
| <b>MHH9481</b> | no  | bronchial rinsing         | I | 4     | R | 32   | S | 1      | R | 4    |
| <b>MHH9484</b> | no  | tonsil swab               | I | 8     | S | 8    | S | 2      | S | 1    |
| <b>MHH9534</b> | no  | bronchial secrete         | I | 8     | R | >32  | R | 8      | I | 2    |
| <b>MHH9652</b> | no  | drainage liquid           | I | 8     | R | 32   | R | 16     | R | >8   |
| <b>MHH9674</b> | no  | bronchoalveolar lavage    | S | 0.125 | S | 2    | S | 0.5    | R | 8    |
| <b>MHH9717</b> | no  | tracheal secrete          | R | 16    | S | 8    | S | 1      | R | >8   |
| <b>MHH9748</b> | no  | tonsil swab               | I | 4     | S | 4    | S | 0.5    | I | 2    |
| <b>MHH9830</b> | no  | tracheal secrete          | I | 8     | R | 32   | S | <=0.25 | I | 2    |
| <b>MHH9854</b> | yes | nasal swab                | I | 8     | R | >256 | S | 2      | S | 1    |

|                   |     |                           |   |      |   |      |   |       |   |       |
|-------------------|-----|---------------------------|---|------|---|------|---|-------|---|-------|
| <b>MHH10047</b>   | no  | tonsil swab               | S | 1    | S | 8    | S | 0.5   | S | 1     |
| <b>MHH10049</b>   | yes | nasal swab                | S | 2    | S | 8    | S | 2     | S | 0.5   |
| <b>MHH10660</b>   | yes | lung transplant donor     | R | >16  | R | >256 | S | 4     | I | 2     |
| <b>MHH10978</b>   | yes | tonsil swab               | I | 4    | R | >32  | S | 4     | R | 8     |
| <b>MHH11148</b>   | no  | tonsil swab               | S | 1    | I | 16   | S | 1     | R | 4     |
| <b>MHH11444</b>   | yes | tonsil swab               | R | 16   | S | 8    | S | 2     | S | 1     |
| <b>MHH11445</b>   | yes | tonsil swab               | I | 4    | S | 8    | S | 4     | S | 1     |
| <b>MHH11540</b>   | no  | midstream urine           | I | 8    | R | 32   | R | 16    | R | >8    |
| <b>MHH11572</b>   | no  | midstream urine           | R | 16   | R | >256 | R | 16    | R | >8    |
| <b>MHH11785</b>   | yes | lung transplant donor     | I | 8    | R | >256 | S | 2     | R | >8    |
| <b>MHH11935</b>   | no  | bronchoalveolar lavage    | I | 8    | S | 8    | S | 1     | S | 1     |
| <b>MHH11989</b>   | yes | tonsil swab               | I | 8    | S | 8    | S | 4     | R | 4     |
| <b>MHH12178</b>   | no  | catheter swab abdomen     | R | 16   | I | 16   | S | 0.5   | S | 0.5   |
| <b>MHH12207</b>   | yes | bronchoalveolar lavage    | I | 8    | R | >32  | S | 1     | I | 2     |
| <b>MHH12269</b>   | yes | sputum                    | R | 16   | R | >32  | S | 0.5   | S | 1     |
| <b>MHH12274</b>   | no  | bronchoalveolar lavage    | S | 0.5  | I | 16   | S | 0.5   | R | 4     |
| <b>MHH13062</b>   | no  | permanent catheter urine  | I | 4    | S | 8    | R | 16    | R | 8     |
| <b>MHH13224</b>   | no  | bronchial rinsing         | I | 8    | S | 8    | S | 2     | I | 2     |
| <b>MHH13305</b>   | yes | bronchial secrete         | R | >16  | R | >32  | R | 16    | R | 4     |
| <b>MHH13395</b>   | no  | bronchoalveolar lavage    | I | 8    | S | 8    | S | 1     | S | 0.5   |
| <b>MHH13428</b>   | no  | swab intraop abdomen      | S | 2    | R | 32   | S | 4     | I | 2     |
| <b>MHH13633</b>   | no  | tracheal secrete          | S | 1    | S | 2    | S | 2     | R | >8    |
| <b>MHH13682</b>   | yes | lung transplant donor     | I | 8    | R | >256 | S | 2     | R | >8    |
| <b>MHH13684</b>   | yes | lung transplant recipient | I | 4    | R | >256 | S | 2     | R | 8     |
| <b>MHH13714</b>   | no  | permanent catheter urine  | S | 0.25 | S | 8    | S | 1     | R | 4     |
| <b>MHH14088</b>   | no  | perfusate                 | S | 2    | S | 8    | S | 4     | I | 2     |
| <b>MHH14103</b>   | no  | swab heel                 | I | 8    | R | >32  | R | 32    | R | >8    |
| <b>MHH14322</b>   | no  | bronchial rinsing         | S | 0.5  | S | 8    | S | 1     | R | 8     |
| <b>MHH14387</b>   | yes | lung transplant recipient | I | 4    | S | 4    | S | 4     | I | 2     |
| <b>MHH14449</b>   | no  | bronchial secrete         | R | >16  | I | 16   | S | <=1   | S | 0.5   |
| <b>RKI_82_10</b>  | nd  | nd                        | R | >32  | R | >32  | R | 64    | R | 32    |
| <b>RKI_12_11</b>  | nd  | nd                        | R | >32  | S | 8    | S | 2     | R | 16    |
| <b>RKI_24_11</b>  | nd  | nd                        | R | >32  | R | >32  | R | 8     | R | 16    |
| <b>RKI_37_11</b>  | nd  | nd                        | R | >32  | I | 16   | S | 2     | S | 2     |
| <b>RKI_53_11</b>  | nd  | nd                        | S | 4    | R | >32  | R | 8     | R | >64   |
| <b>RKI_359_11</b> | nd  | nd                        | R | >32  | R | 32   | R | 96    | R | 64    |
| <b>RKI_360_11</b> | nd  | nd                        | R | >32  | I | 16   | R | 64    | R | 64    |
| <b>RKI_392_11</b> | nd  | nd                        | S | 0.25 | S | 8    | S | 0.125 | S | 0.063 |
| <b>RKI_395_11</b> | nd  | nd                        | I | 8    | R | 32   | S | 0.25  | S | 1     |

|                   |    |    |   |        |   |      |   |     |   |         |
|-------------------|----|----|---|--------|---|------|---|-----|---|---------|
| <b>RKI_100_12</b> | nd | nd | R | >32    | R | 32   | S | 0.5 | S | 0.25    |
| <b>RKI_96_12</b>  | nd | nd | I | 8      | R | >32  | R | 512 | S | 0.5     |
| <b>RKI_98_12</b>  | nd | nd | R | 16     | S | 4    | S | 0.5 | R | 8       |
| <b>RKI_99_12</b>  | nd | nd | R | 16     | R | 32   | S | 1   | R | 8       |
| <b>RKI_339_12</b> | nd | nd | R | >32    | R | >256 | S | 1.5 | S | 0.25    |
| <b>B34</b>        | nd | nd | S | <=0.25 | R | >265 | R | 64  | I | 0.5     |
| <b>B197</b>       | nd | nd | R | >=16   | S | 8    | S | 1   | S | <=0.125 |
| <b>B214</b>       | nd | nd | I | 8      | S | 8    | S | 2   | S | 0.5     |
| <b>B271</b>       | nd | nd | S | 0.5    | S | <=1  | S | 0.5 | S | <=0.125 |
| <b>B266</b>       | nd | nd | R | >=16   | I | 16   | S | 1   | I | 1       |
| <b>B337</b>       | nd | nd | I | 8      | S | <=1  | S | 0.5 | S | <=0.125 |
| <b>B428</b>       | nd | nd | R | >32    | S | 8    | S | 1   | S | 0.5     |
| <b>B445</b>       | nd | nd | R | 32     | S | <=1  | S | 0.5 | S | <=0.25  |

R= resistant, I= intermediate resistant, S= susceptible; nd= not determined

\*The MIC values are given in µg/ml, and the classification of resistance and susceptibility is according to CLSI guidelines.

**Supplementary Table 2: Resistance-associated markers for gene expression and sequence variations**

All genetic markers found to be directly associated with resistance in either the receiver operating characteristic analyses (expression association) or the linear mixed model analyses (SNP association) are listed with their respective AUC\* or p-value.

| Antibiotic | Isolates [n] |           | Expression association  |                  | SNP association  |          |                    |          |
|------------|--------------|-----------|-------------------------|------------------|------------------|----------|--------------------|----------|
|            | Susceptible  | Resistant | Gene                    | AUC <sup>#</sup> | Gene/SNP         | p-value  |                    |          |
| <b>CIP</b> | 38           | 77 (0)*   | PA14_46470, <i>pdxB</i> | 0.760            | <i>gyrA</i> T83I | 5.88E-18 |                    |          |
|            |              |           | PA14_31480              | 0.759            |                  |          | <i>parC</i> S87L/W | 4.07E-07 |
|            |              |           | PA14_53010, <i>phhC</i> | 0.759            |                  |          |                    |          |
|            |              |           | PA14_62530, <i>cbrA</i> | 0.742            |                  |          |                    |          |
|            |              |           | PA14_63890              | 0.741            |                  |          |                    |          |
|            |              |           | PA14_33130              | 0.739            |                  |          |                    |          |
| <b>CAZ</b> | 59           | 44 (17)*  | PA14_10790, <i>ampC</i> | 0.837            | <i>ampC</i> T55A | 2.92E-07 |                    |          |
|            |              |           | PA14_10780              | 0.765            |                  |          |                    |          |
|            |              |           | PA14_21130              | 0.753            |                  |          |                    |          |
|            |              |           | PA14_62920              | 0.742            |                  |          |                    |          |
| <b>MEM</b> | 46           | 31 (14)*  | PA14_46110              | 0.736            | 0                |          |                    |          |
|            |              |           | PA14_72460, <i>cc4</i>  | 0.731            |                  |          |                    |          |
|            |              |           | PA14_46070, <i>gbuA</i> | 0.731            |                  |          |                    |          |

\*Number of isolates with acquired resistance enzymes, which were excluded for the association study of CAZ and MEM

<sup>#</sup>Area under the curve: probability that the classifier will rank a randomly chosen positive example higher than a randomly chosen negative one (maximum achievable value = 1). The significance threshold was calculated based on a corrected maximal p-value of 0.05 for each dataset.



1. **Huang H, Jeanteur D, Pattus F, Hancock RE.** 1995. Membrane topology and site-specific mutagenesis of *Pseudomonas aeruginosa* porin OprD. *Molecular microbiology* **16**:931-941.
2. **Biswas S, Mohammad MM, Patel DR, Movileanu L, van den Berg B.** 2007. Structural insight into OprD substrate specificity. *Nature structural & molecular biology* **14**:1108-1109.
